# Supplementary material for: Low ambient temperature during early postnatal development fails to cause a permanent induction of brown adipocytes
Source: PubMed Central journal article supplement (PMC4511198; doi:10.1096/fj.15-271395), 2015-04-20
Supplement: supp_fj.15-271395_Supplemental_Figure1.pdf [file supp_fj.15-271395_Supplemental_Figure1.pdf]

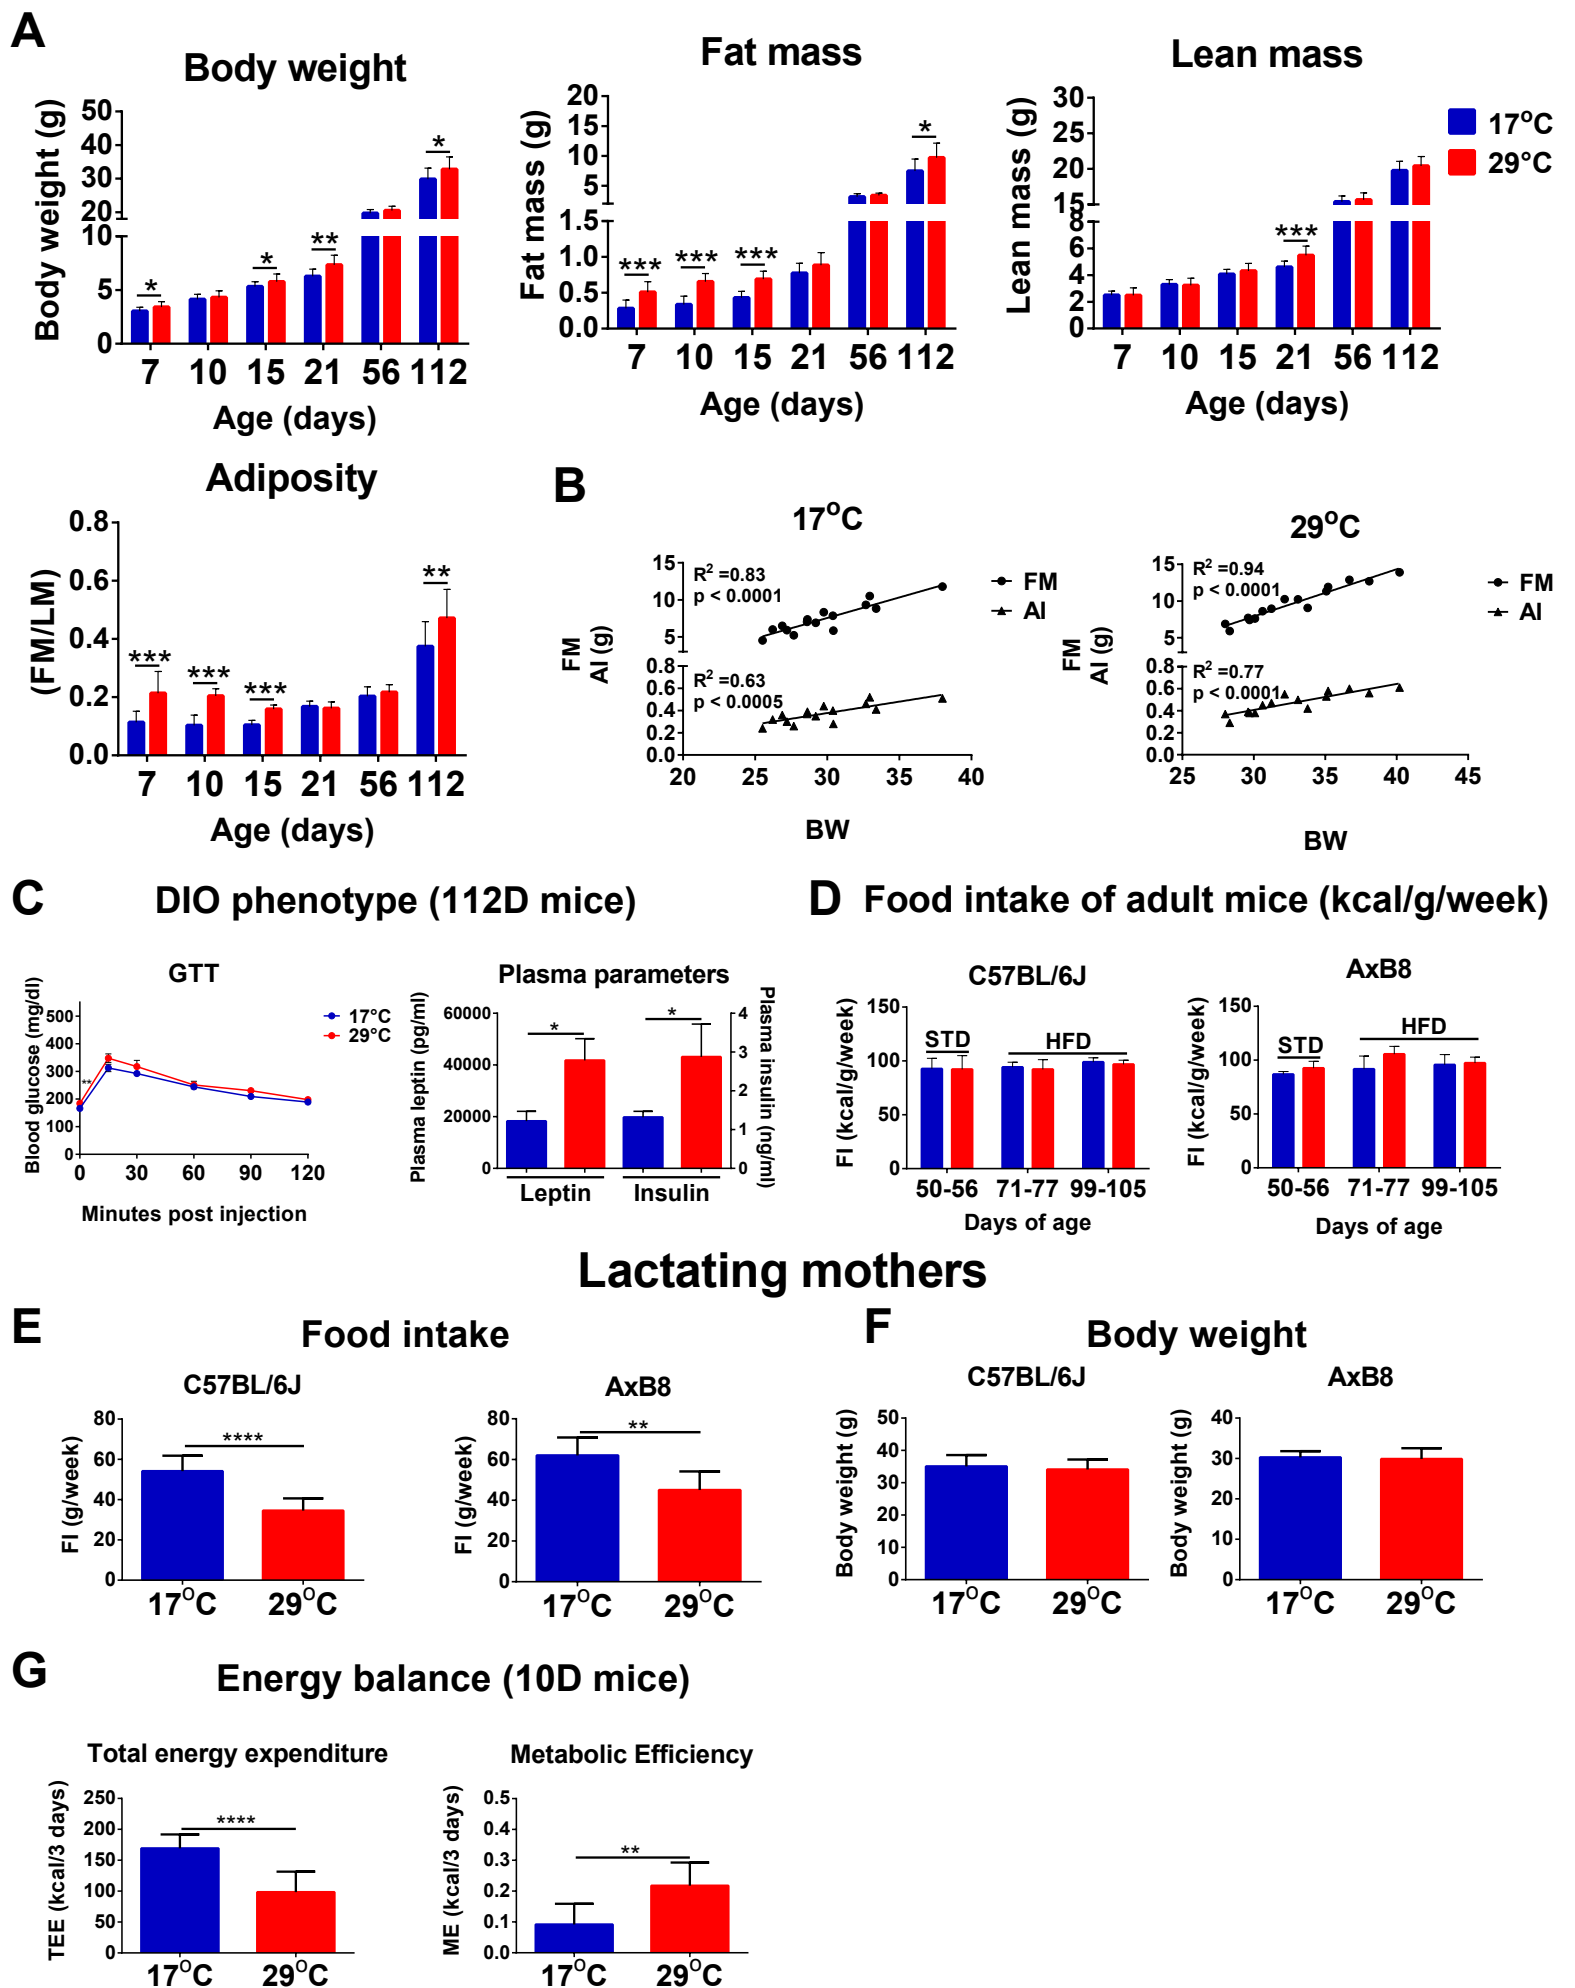

**Figure S1. The phenotypic characterization of mice (related to Figure 1).** A) Adiposity phenotypes of AxB8 mice ( $n=15$  at  $17^{\circ}\text{C}$ ,  $n=15$  at  $29^{\circ}\text{C}$ ). B) Correlation coefficient analysis between BW and FM and BW and adiposity index (FM/LM) as determined by NMR in 112D AxB8 mice. C) Diet-induced obesity phenotype determined by glucose tolerance test (GTT) and plasma parameters in 112D AxB8 mice ( $n=7/\text{group}$ ). D) Weekly food intake of adult B6 and AxB8 mice presented as a value of kcal/g/week. E) Food intake (g/week) and (F) body weight of lactating B6 ( $n=17$  at  $17^{\circ}\text{C}$ ,  $n=13$  at  $29^{\circ}\text{C}$ ) and AxB8 females ( $n=8$  at  $17^{\circ}\text{C}$ ,  $n=12$  at  $29^{\circ}\text{C}$ ). G) Total energy expenditure and metabolic efficiency in 10D AxB8 mice (8 pups/litter). Data are mean  $\pm$  SD. \*  $p<0.05$ ; \*\*  $p<0.01$ ; \*\*\*  $p<0.001$ .
