# Supplementary material for: Low ambient temperature during early postnatal development fails to cause a permanent induction of brown adipocytes
Source: PubMed Central journal article supplement (PMC4511198; doi:10.1096/fj.15-271395), 2015-04-20
Supplement: supp_fj.15-271395_Supplemental_Figure2.pdf [file supp_fj.15-271395_Supplemental_Figure2.pdf]

C57BL/6J

AxB8

A

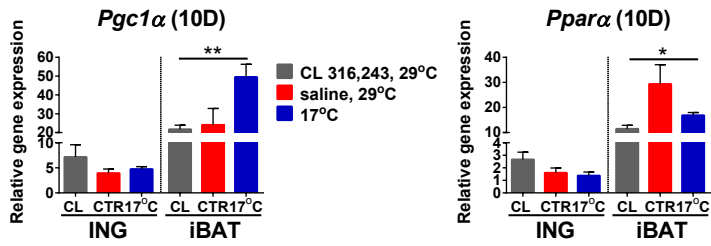

B

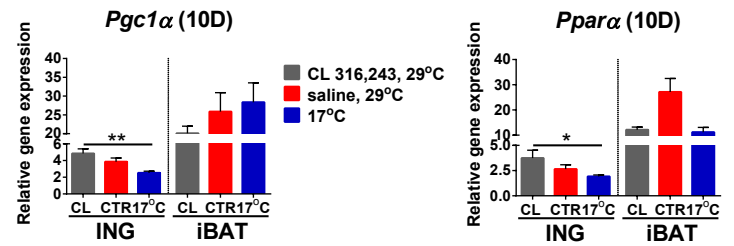

C

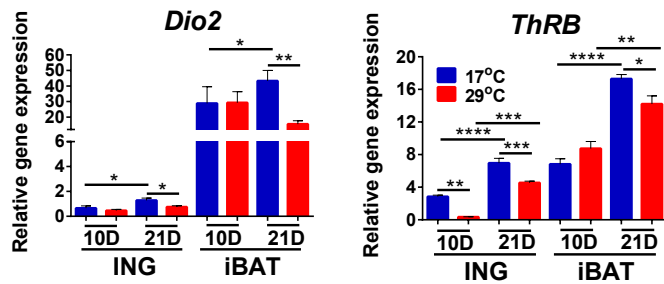

D

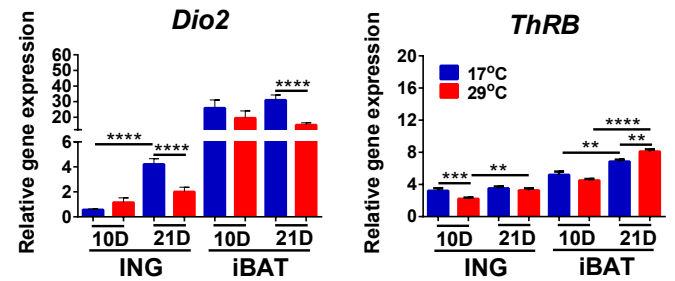

10D mice injected with T3/saline

E

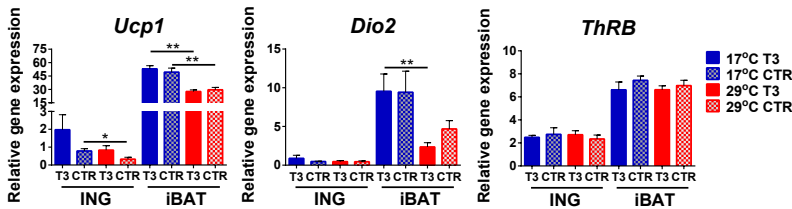

F

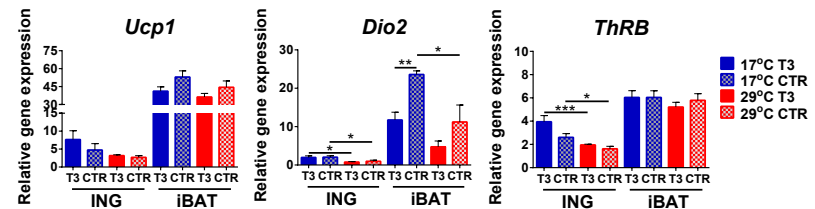

21D mice injected with T3/saline

G

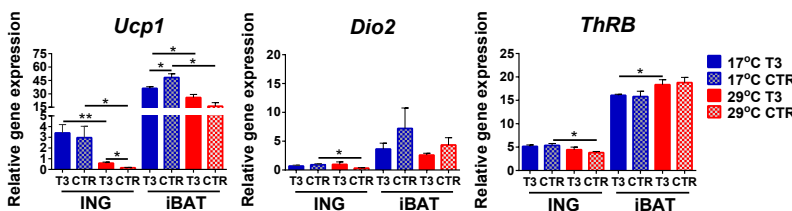

H

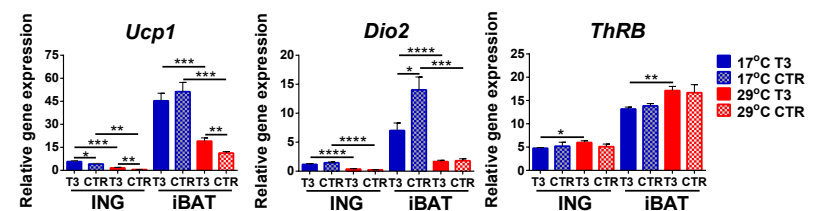

**Figure S2. Gene expression analysis in inguinal WAT and iBAT during early postnatal development after intraperitoneal CL or T3 administration (related to Figure 2).** (A) *Pgc1α* and *Ppara* mRNA levels in 10D B6 and (B) AxB8 mice injected with CL 316,243 (CL) or saline (CTR). Graphs include a comparison between CL-injected and mice raised at 17°C. (C) *Dio2* and *Thrb* mRNA levels in 10D and 21D B6 and (D) AxB8 mice. (E) *Ucp1*, *Dio2* and *Thrb* mRNA levels in 10D B6 and (F) AxB8 mice injected with T3 or saline for 3 consecutive days. (G) Corresponding gene expression in 21D T3/ saline-injected B6 and (H) AxB8 mice. Data are mean ± SEM. n = 4-11 mice per group. \* p<0.05; \*\* p<0.01; \*\*\* p<0.001; \*\*\*\* p<0.0001.
