# Supplementary material for: Low ambient temperature during early postnatal development fails to cause a permanent induction of brown adipocytes
Source: PubMed Central journal article supplement (PMC4511198; doi:10.1096/fj.15-271395), 2015-04-20
Supplement: supp_fj.15-271395_Supplemental_Table1.pdf [file supp_fj.15-271395_Supplemental_Table1.pdf]

**Table S1. Phenotypes of C57BL/6J and AxB8 mice maintained at different ambient temperatures during early post-natal development (related to Figure 1) - an effect of the ambient temperature or genetic background (Two-way ANOVA).**

|     |                | C57BL/6J      |               | AxB8          |               | Two-way ANOVA |             |             |
|-----|----------------|---------------|---------------|---------------|---------------|---------------|-------------|-------------|
|     |                | 17°C          | 29°C          | 17°C          | 29°C          | strain        | temperature | interaction |
| Day |                | Mean (g) ± SD | Mean (g) ± SD | Mean (g) ± SD | Mean (g) ± SD |               |             |             |
| 7   | Number of mice | 57            | 42            | 56            | 64            |               |             |             |
|     | Body weight    | 3.97 ± 0.53   | 3.82 ± 0.60   | 3.66 ± 0.57   | 3.76 ± 0.64   | *             | ns          | no          |
|     | Fat mass       | 0.38 ± 0.13   | 0.45 ± 0.11   | 0.43 ± 0.16   | 0.52 ± 0.12   | **            | ****        | no          |
|     | Lean mass      | 3.30 ± 0.44   | 3.11 ± 0.49   | 2.92 ± 0.48   | 2.89 ± 0.60   | ****          | ns          | no          |
|     | Adiposity      | 0.12 ± 0.05   | 0.14 ± 0.02   | 0.14 ± 0.04   | 0.19 ± 0.06   | ****          | ****        | no          |
| 10  | Number of mice | 54            | 52            | 56            | 71            |               |             |             |
|     | Body weight    | 5.06 ± 0.68   | 5.01 ± 0.52   | 4.79 ± 0.70   | 4.73 ± 0.80   | **            | ns          | no          |
|     | Fat mass       | 0.37 ± 0.17   | 0.50 ± 0.13   | 0.41 ± 0.13   | 0.59 ± 0.14   | ***           | ****        | no          |
|     | Lean mass      | 4.16 ± 0.55   | 3.94 ± 0.45   | 3.74 ± 0.55   | 3.59 ± 0.65   | ****          | *           | no          |
|     | Adiposity      | 0.09 ± 0.04   | 0.13 ± 0.03   | 0.11 ± 0.03   | 0.17 ± 0.04   | ****          | ****        | yes (*)     |
| 15  | Number of mice | 47            | 48            | 46            | 46            |               |             |             |
|     | Body weight    | 6.65 ± 0.62   | 6.44 ± 0.63   | 5.75 ± 0.73   | 5.87 ± 0.79   | ****          | ns          | no          |
|     | Fat mass       | 0.31 ± 0.23   | 0.49 ± 0.16   | 0.44 ± 0.13   | 0.65 ± 0.17   | ****          | ****        | no          |
|     | Lean mass      | 5.47 ± 0.62   | 5.14 ± 0.55   | 4.46 ± 0.64   | 4.49 ± 0.63   | ****          | ns          | no          |
|     | Adiposity      | 0.06 ± 0.04   | 0.10 ± 0.03   | 0.10 ± 0.02   | 0.15 ± 0.03   | ****          | ****        | no          |
| 21  | Number of mice | 51            | 48            | 48            | 51            |               |             |             |
|     | Body weight    | 7.55 ± 0.77   | 8.26 ± 1.17   | 7.10 ± 1.00   | 7.43 ± 1.10   | ****          | ***         | no          |
|     | Fat mass       | 0.64 ± 0.29   | 0.91 ± 0.33   | 0.77 ± 0.16   | 0.89 ± 0.20   | ns            | ****        | yes (*)     |
|     | Lean mass      | 6.06 ± 0.77   | 6.55 ± 1.12   | 5.28 ± 0.88   | 5.72 ± 0.81   | ****          | ***         | no          |
|     | Adiposity      | 0.10 ± 0.04   | 0.14 ± 0.03   | 0.15 ± 0.03   | 0.16 ± 0.03   | ****          | ***         | yes (**)    |
| 56  | Number of mice | 31            | 31            | 31            | 34            |               |             |             |
|     | Body weight    | 23.18 ± 1.19  | 21.98 ± 1.20  | 20.28 ± 1.56  | 20.09 ± 1.26  | ****          | **          | yes (*)     |
|     | Fat mass       | 3.68 ± 0.47   | 3.38 ± 0.33   | 3.15 ± 0.50   | 3.38 ± 0.43   | ***           | ns          | yes (**)    |
|     | Lean mass      | 17.87 ± 1.30  | 16.49 ± 1.41  | 16.02 ± 1.22  | 15.68 ± 1.05  | ***           | ****        | yes(*)      |
|     | Adiposity      | 0.21 ± 0.02   | 0.21 ± 0.02   | 0.20 ± 0.03   | 0.22 ± 0.03   | ns            | *           | yes (*)     |
| 112 | Number of mice | 16            | 16            | 15            | 15            |               |             |             |
|     | Body weight    | 35.19 ± 2.83  | 38.52 ± 3.06  | 29.84 ± 3.31  | 32.79 ± 3.66  | ****          | ***         | no          |
|     | Fat mass       | 10.52 ± 2.27  | 13.44 ± 2.19  | 7.46 ± 2.01   | 9.69 ± 2.44   | ****          | ****        | no          |
|     | Lean mass      | 21.83 ± 0.77  | 22.18 ± 1.13  | 19.78 ± 1.29  | 20.41 ± 1.34  | ****          | ns          | no          |
|     | Adiposity      | 0.48 ± 0.10   | 0.60 ± 0.08   | 0.37 ± 0.09   | 0.47 ± 0.10   | ****          | ****        | no          |

Data are mean ± SD. p<0.05; \*\* p<0.01; \*\*\* p<0.001; \*\*\*\* p<0.0001
