# Supplementary material for: Low ambient temperature during early postnatal development fails to cause a permanent induction of brown adipocytes
Source: PubMed Central journal article supplement (PMC4511198; doi:10.1096/fj.15-271395), 2015-04-20
Supplement: supp_fj.15-271395_Supplemental_Table2.pdf [file supp_fj.15-271395_Supplemental_Table2.pdf]

**Table S2. Top genes up-regulated in inguinal WAT of 21D B6 mice as an effect of decreased ambient temperature (n=8 for both 17°C and 29°C) (related to Figure 3). Fold change difference is generated based on normalized signals (not shown).**

| <b>Gene symbol</b> | <b>Gene name</b>                                                            | <b>P value (corr)</b> | <b>FC</b> | <b>Raw data 17°C</b> | <b>Raw data 29°C</b> |
|--------------------|-----------------------------------------------------------------------------|-----------------------|-----------|----------------------|----------------------|
| <b>Cyp2b10</b>     | Cytochrome P450, family 2, subfamily b, polypeptide 10                      | 0.0042                | 16.69     | 2861.06              | 174.60               |
| <b>Ucp1</b>        | Uncoupling protein 1                                                        | 0.0329                | 5.94      | 57633.08             | 10307.54             |
| <b>Lrtm1</b>       | Leucine-rich repeats and transmembrane domains 1                            | 0.0104                | 4.09      | 447.93               | 108.70               |
| <b>Cyp2f2</b>      | Cytochrome P450, family 2, subfamily f, polypeptide 2                       | 0.0187                | 2.56      | 25162.36             | 10328.67             |
| <b>Aspg</b>        | Asparaginase homolog (S. cerevisiae)                                        | 0.0098                | 2.36      | 5494.65              | 2441.37              |
| <b>Car14</b>       | Carbonic anhydrase 14                                                       | 0.0095                | 2.32      | 758.87               | 332.26               |
| <b>Poln</b>        | DNA polymerase N                                                            | 0.0179                | 2.25      | 3336.37              | 1545.85              |
| <b>Gyk</b>         | Glycerol kinase                                                             | 0.0273                | 2.25      | 535.15               | 241.20               |
| <b>Acot11</b>      | Acyl-coA thioesterase 11                                                    | 0.0350                | 2.23      | 1200.45              | 551.28               |
| <b>Trim67</b>      | Tripartite motif-containing 67                                              | 0.0349                | 2.03      | 715.38               | 358.93               |
| <b>Cox7a1</b>      | Cytochrome c oxidase subunit VIIA 1                                         | 0.0485                | 1.87      | 82695.64             | 46334.86             |
| <b>Gpd2</b>        | Glycerol phosphatase dehydrogenase 2, mitochondrial                         | 0.0180                | 1.84      | 3994.36              | 2272.89              |
| <b>Slc25a35</b>    | Solute carrier family, 25, member 35                                        | 0.0273                | 1.83      | 2559.27              | 1457.64              |
| <b>Cldn5</b>       | Claudin 5                                                                   | 0.0076                | 1.80      | 12119.40             | 7132.87              |
| <b>C1qtnf4</b>     | C1q and tumor necrosis factor related protein                               | 0.0178                | 1.78      | 317.88               | 179.46               |
| <b>Cox8b</b>       | Cytochrome c oxidase subunit VIIIb                                          | 0.0122                | 1.69      | 147178.90            | 91980.50             |
| <b>Zfp787</b>      | Zinc finger protein 787                                                     | 0.0043                | 1.68      | 3304.99              | 2047.76              |
| <b>Slc26a10</b>    | Solute carrier family, 26, member 10                                        | 0.0043                | 1.65      | 320.51               | 194.24               |
| <b>Bcl6</b>        | B cell leukemia/lymphoma 6                                                  | 0.0471                | 1.65      | 12571.11             | 8073.23              |
| <b>Mtor</b>        | Mechanistic target of rapamycin (serine threonine kinase)                   | 0.0319                | 1.61      | 361.11               | 226.37               |
| <b>Cidea</b>       | Cell death-inducing DNA fragmentation factor, alpha subunit-like effector A | 0.0460                | 1.60      | 154086.10            | 102445.40            |
